# Supplementary material for: Physiological Responses of Amaranthus Cruentus L. to Drought Stress Under Sufficient- and Deficient-Nitrogen Conditions
Source: Research Square preprint supplement (doi:10.21203/rs.3.rs-712658/v1), 2021-07-22
Supplement: Supplementary file 1 [file 0b219f071c6595c216365e87.pdf]

## Supplementary Material

### Physiological responses of *Amaranthus cruentus* L. to drought stress under sufficient- and deficient-nitrogen conditions

Inês Cechin<sup>1,\*</sup>, Laura Prado da Silva , Elisa Teófilo Ferreira , Sarah Corrêa Barrochelo , Fernanda Pereira de Souza Rosa de Melo , Anne Lígia Dokkedal, Luiz Leonardo Saldanha

Department of Biological Sciences, Faculty of Sciences, UNESP – São Paulo State University, Bauru, SP CEP 17033-360, Brazil

\*Corresponding author

*Email address:* ines.cechin@unesp.br (Inês Cechin)

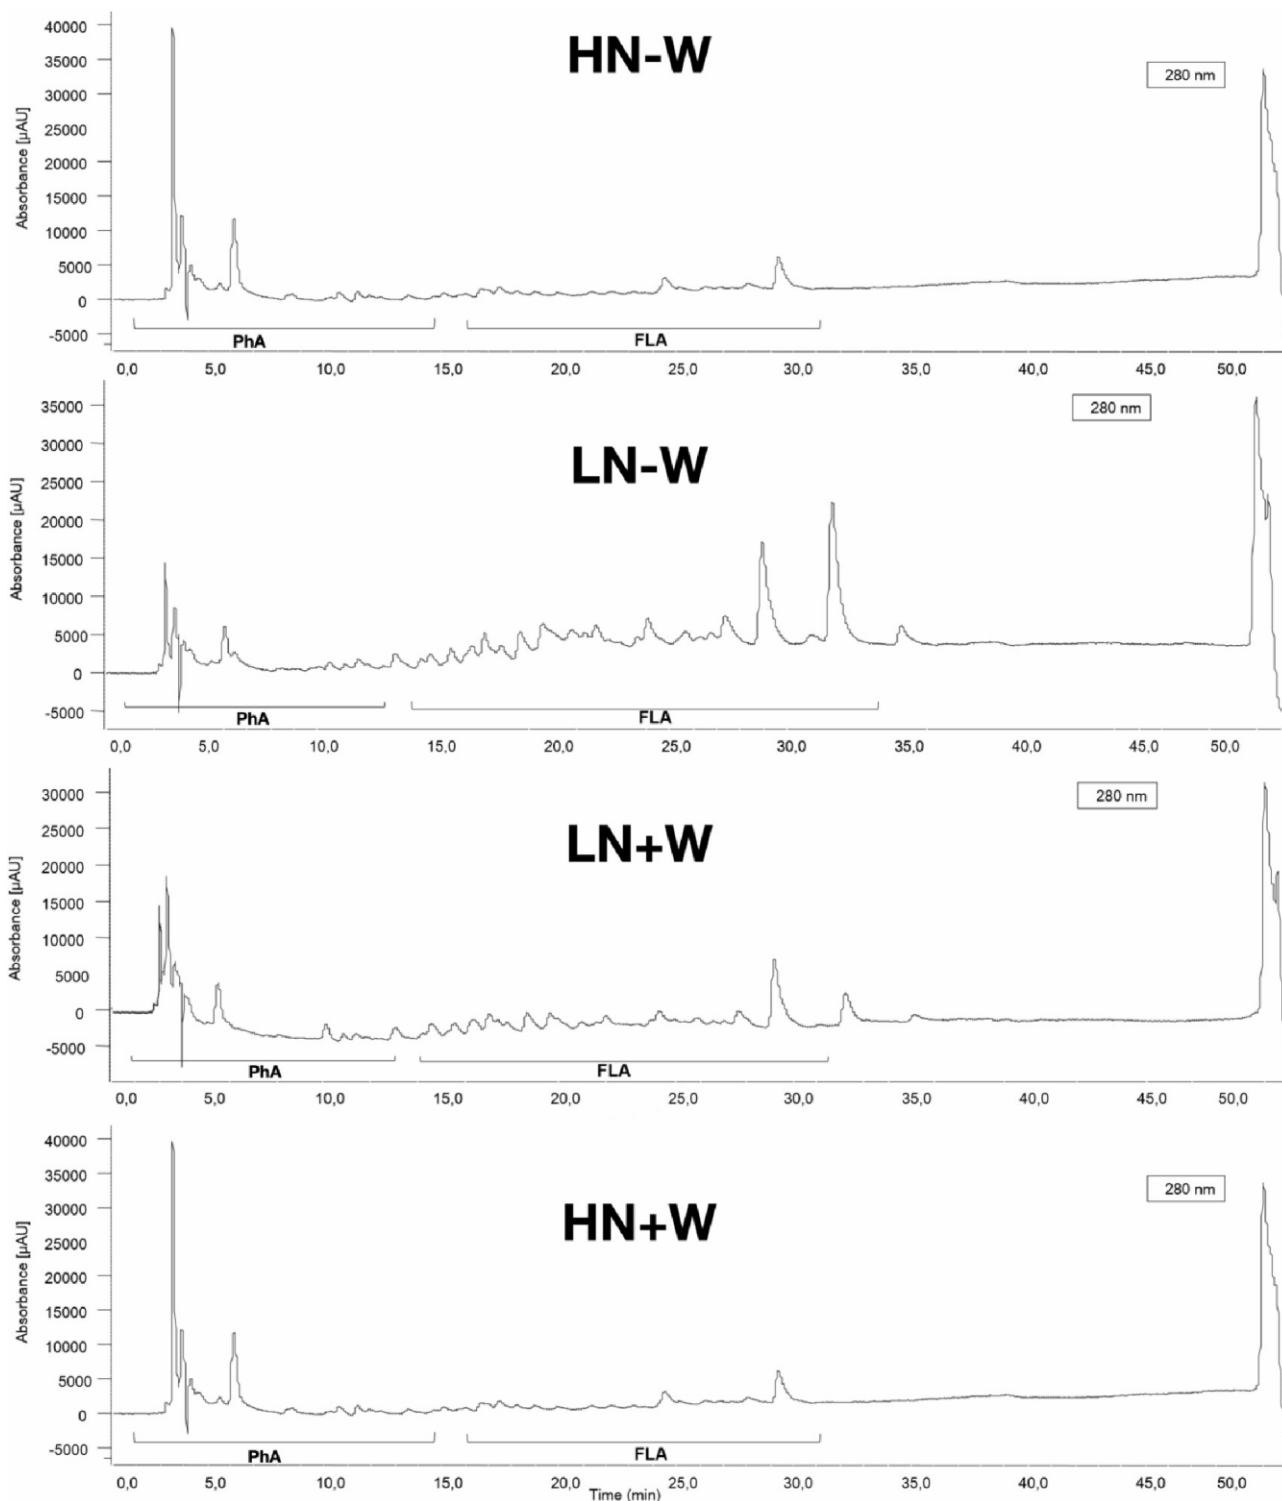

**Figure S1:** Representative analytical chromatograms obtained by HPLC-PAD from the 85% MeOH leaves extract of amaranth plants grown under different conditions of nitrogen and water supply. The peaks in the chromatogram were identified as phenolic acids (PhA) and as flavonoids (FLA) based on UV-vis absorption patterns by means of PAD analysis. Legend: high nitrogen and stressed (HN-W), low nitrogen and stressed (LN-W), low nitrogen and well hydrated (LN+W) and high nitrogen and well hydrated (HN+W) plants.

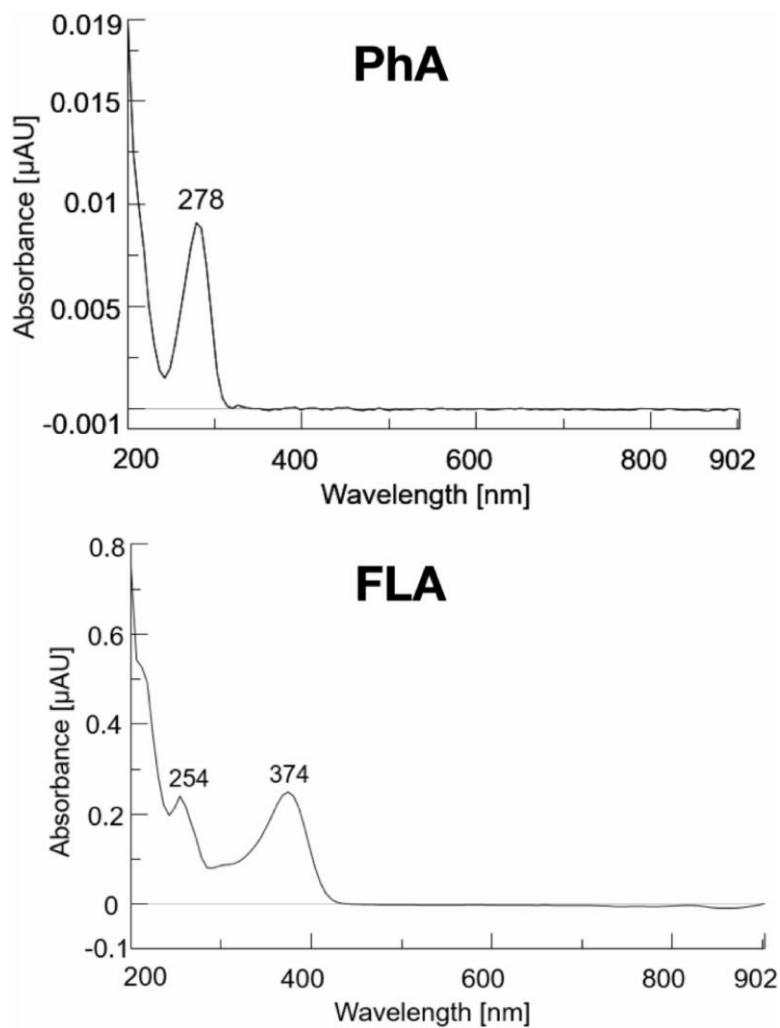

**Figure S2:** Representative UV-vis spectra obtained by HPLC-PAD of peaks from the analytical chromatograms of amaranth plants 85% MeOH extracts assigned as phenolic acid (PhA) and as flavonoid (FLA) derivatives.
